# Supplementary material for: Multiple autophosphorylations significantly enhance the endoribonuclease activity of human inositol requiring enzyme 1α
Source: PubMed Central journal article supplement (PMC3928614; doi:10.1186/1471-2091-15-3), 2014-02-13
Supplement: 1471-2091-15-3-S1.pdf [file 1471-2091-15-3-S1.pdf]

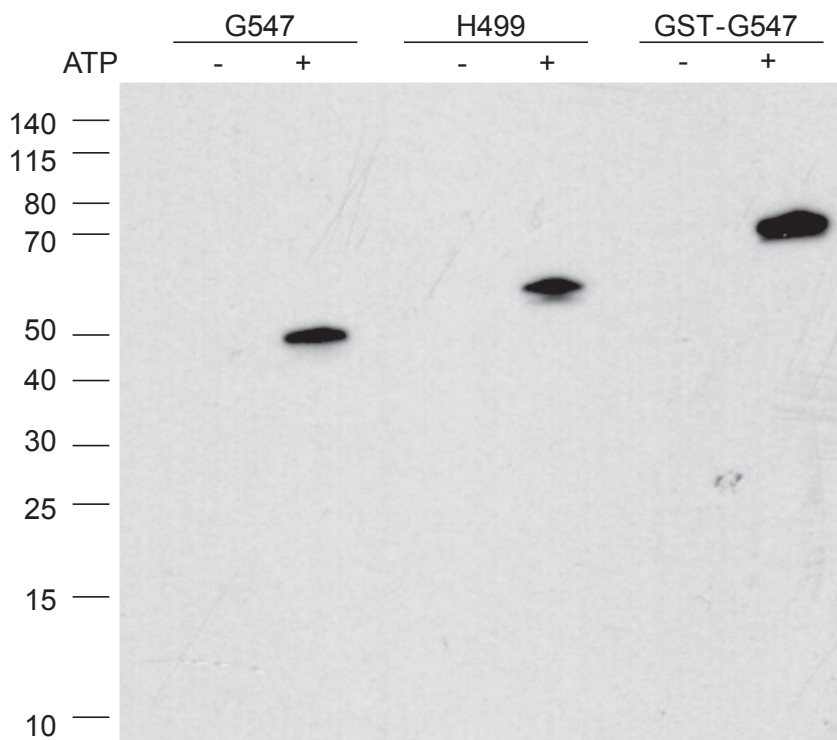

Figure S1.
